# Supplementary material for: The changing relationship between rainfall and children’s physical activity in spring and summer: a longitudinal study
Source: PubMed Central journal article supplement (PMC4377032; doi:10.1186/s12966-015-0202-8), 2015-03-21
Supplement: 12966_2015_202_MOESM1_ESM.pdf [file 12966_2015_202_MOESM1_ESM.pdf]

Supplementary Table 1. Results of multilevel regression models of daily physical activity and sedentary time by rainfall category.

|                                 | MVPA    |       |                  | VPA     |       |                  | Sedentary time |        |                  | counts per minute |         |                  |
|---------------------------------|---------|-------|------------------|---------|-------|------------------|----------------|--------|------------------|-------------------|---------|------------------|
|                                 | $\beta$ | S.E.  | p                | $\beta$ | S.E.  | p                | $\beta$        | S.E.   | p                | $\beta$           | S.E.    | p                |
| Age (years)                     | 2.387   | 3.41  | <i>0.484</i>     | 0.467   | 1.952 | <i>0.811</i>     | 2.761          | 5.725  | <i>0.629</i>     | -12.697           | 32.082  | <i>0.692</i>     |
| Sex (female)                    | -12.915 | 1.988 | <b>&lt;0.001</b> | -8.631  | 1.18  | <b>&lt;0.001</b> | 18.997         | 3.452  | <b>&lt;0.001</b> | -87.404           | 19.524  | <b>&lt;0.001</b> |
| Weekend day                     | 3.262   | 0.956 | <b>0.001</b>     | 1.245   | 0.521 | 0.017            | -17.529        | 1.561  | <b>&lt;0.001</b> | 56.194            | 8.753   | <b>&lt;0.001</b> |
| Registered time (minutes)       | 0.115   | 0.006 | <b>&lt;0.001</b> | 0.041   | 0.003 | <b>&lt;0.001</b> | 0.615          | 0.009  | <b>&lt;0.001</b> |                   |         |                  |
| Daytime temperature (°C)        | 0.147   | 0.145 | <i>0.313</i>     | -0.143  | 0.079 | <i>0.070</i>     | -0.708         | 0.234  | <b>0.003</b>     | 1.892             | 1.397   | <i>0.176</i>     |
| Study Phase                     |         |       |                  |         |       |                  |                |        |                  |                   |         |                  |
| SPEEDY 2 (2008)                 | -7.868  | 3.678 | 0.032            | -3.807  | 2.083 | <i>0.068</i>     | 9.53           | 6.125  | <i>0.120</i>     | -67.882           | 34.706  | <i>0.050</i>     |
| SPEEDY 3 (2011)                 | -24.877 | 13.97 | <i>0.075</i>     | -9.93   | 7.994 | <i>0.214</i>     | 44.966         | 23.421 | <i>0.055</i>     | -167.54           | 131.278 | <i>0.202</i>     |
| Rainfall tertile                |         |       |                  |         |       |                  |                |        |                  |                   |         |                  |
| T2: >0 - <1.7mm                 | -7.955  | 1.883 | <b>&lt;0.001</b> | -3.269  | 1.022 | <b>0.001</b>     | 14.875         | 3.055  | <b>&lt;0.001</b> | -63.413           | 18.009  | <b>&lt;0.001</b> |
| T3: $\geq$ 1.7mm                | -14.008 | 1.872 | <b>&lt;0.001</b> | -7.056  | 1.018 | <b>&lt;0.001</b> | 22.81          | 3.04   | <b>&lt;0.001</b> | -134.434          | 18.064  | <b>&lt;0.001</b> |
| Interactions                    |         |       |                  |         |       |                  |                |        |                  |                   |         |                  |
| Rainfall T2 # SPEEDY 2          | 2.43    | 2.538 | <i>0.338</i>     | 0.77    | 1.373 | <i>0.575</i>     | -5.373         | 4.103  | <i>0.190</i>     | 9.817             | 24.047  | <i>0.683</i>     |
| Rainfall T3 # SPEEDY 2          | 2.576   | 2.62  | <i>0.325</i>     | 1.857   | 1.437 | <i>0.196</i>     | -2.94          | 4.293  | <i>0.493</i>     | 32.365            | 25.789  | <i>0.209</i>     |
| Rainfall T2 # SPEEDY 3          | 12.691  | 2.744 | <b>&lt;0.001</b> | 6.298   | 1.488 | <b>&lt;0.001</b> | -19.079        | 4.419  | <b>&lt;0.001</b> | 108.104           | 26.299  | <b>&lt;0.001</b> |
| Rainfall T3 # SPEEDY 3          | 8.139   | 2.608 | <b>0.002</b>     | 3.904   | 1.407 | <b>0.006</b>     | -16.674        | 4.196  | 0.016            | 91.154            | 24.844  | <b>&lt;0.001</b> |
| Variance Partition Coefficients |         |       |                  |         |       |                  |                |        |                  |                   |         |                  |
| School                          | 11.6%   |       | <b>0.008</b>     | 17.1%   |       | <b>0.008</b>     | 11.1%          |        | <b>0.008</b>     | 14.5%             |         | <b>0.008</b>     |
| Participant                     | 19.4%   |       | <b>&lt;0.001</b> | 19.8%   |       | <b>&lt;0.001</b> | 21.3%          |        | <b>&lt;0.001</b> | 18.0%             |         | <b>&lt;0.001</b> |
| Day                             | 69.1%   |       | <b>&lt;0.001</b> | 63.1%   |       | <b>&lt;0.001</b> | 67.6%          |        | <b>&lt;0.001</b> | 67.5%             |         | <b>&lt;0.001</b> |

Reference categories for categorical variables: Sex = male, Weekend day = week day, Study phase = SPEEDY 1 (2007), Rainfall tertile = Tertile 1 (0mm rain).

Variance Partition Coefficients describe the percentage of residual variance remaining at each level of the model hierarchy.

For p values, **bold font** indicates statistical significance  $p < 0.01$ , regular font indicates statistical significance  $p < 0.05$ , and *italic font* indicates statistical non-significance ( $p \geq 0.05$ )
