# Supplementary material for: The changing relationship between rainfall and children’s physical activity in spring and summer: a longitudinal study
Source: PubMed Central journal article supplement (PMC4377032; doi:10.1186/s12966-015-0202-8), 2015-03-21
Supplement: 12966_2015_202_MOESM2_ESM.pdf [file 12966_2015_202_MOESM2_ESM.pdf]

Supplementary Table 2. Results of multilevel regression models of moderate-to-vigorous physical activity in different periods of the school day.

|                                 | All day<br>(7am-9pm) |        |                  | Morning Travel<br>(8am-9am) |       |                  | Lunchtime<br>(12noon-2pm) |       |                  | After school<br>(4pm-9pm) |       |                  |
|---------------------------------|----------------------|--------|------------------|-----------------------------|-------|------------------|---------------------------|-------|------------------|---------------------------|-------|------------------|
|                                 | $\beta$              | S.E.   | p                | $\beta$                     | S.E.  | p                | $\beta$                   | S.E.  | p                | $\beta$                   | S.E.  | p                |
| Age (years)                     | 3.245                | 3.452  | <i>0.347</i>     | 1.881                       | 0.714 | <b>0.008</b>     | 0.159                     | 0.781 | <i>0.840</i>     | 0.013                     | 1.757 | <i>1.000</i>     |
| Sex (female)                    | -14.78               | 2.102  | <b>&lt;0.001</b> | -0.491                      | 0.438 | <i>0.262</i>     | -5.678                    | 0.473 | <b>&lt;0.001</b> | -4.892                    | 1.054 | <b>&lt;0.001</b> |
| Registered time (minutes)       | 0.11                 | 0.006  | <b>&lt;0.001</b> | 0.144                       | 0.005 | <b>&lt;0.001</b> | 0.103                     | 0.011 | <b>&lt;0.001</b> | 0.105                     | 0.098 | <b>&lt;0.001</b> |
| Daytime temperature (°C)        | -0.062               | 0.153  | <i>0.686</i>     | -0.013                      | 0.03  | <i>0.649</i>     | -0.095                    | 0.043 | 0.025            | 0.126                     | 0.005 | <i>0.285</i>     |
| Study Phase                     |                      |        |                  |                             |       |                  |                           |       |                  |                           |       |                  |
| SPEEDY 2 (2008)                 | -5.903               | 3.82   | <i>0.122</i>     | -2.116                      | 0.774 | <b>0.006</b>     | -0.96                     | 0.882 | <i>0.276</i>     | -3.291                    | 2.042 | <i>0.107</i>     |
| SPEEDY 3 (2011)                 | -23.82               | 14.157 | <i>0.092</i>     | -7.194                      | 2.931 | 0.014            | -4.578                    | 3.215 | <i>0.154</i>     | -11.155                   | 7.213 | <i>0.122</i>     |
| Rainfall tertile                |                      |        |                  |                             |       |                  |                           |       |                  |                           |       |                  |
| T2: >0 - <1.7mm                 | -5.409               | 1.898  | <b>0.004</b>     | -0.322                      | 0.363 | <i>0.375</i>     | -0.441                    | 0.522 | <i>0.398</i>     | -3.685                    | 1.256 | <b>0.003</b>     |
| T3: $\geq$ 1.7mm                | -12.159              | 2.04   | <b>&lt;0.001</b> | -1.143                      | 0.391 | <b>0.003</b>     | -3.15                     | 0.549 | <b>&lt;0.001</b> | -6.785                    | 1.314 | <b>&lt;0.001</b> |
| Interactions                    |                      |        |                  |                             |       |                  |                           |       |                  |                           |       |                  |
| Rainfall T2 # SPEEDY 2          | -2.846               | 2.57   | <i>0.268</i>     | 0.498                       | 0.492 | <i>0.312</i>     | -1.153                    | 0.711 | <i>0.105</i>     | 0.268                     | 1.708 | <i>0.874</i>     |
| Rainfall T3 # SPEEDY 2          | -1.516               | 2.975  | <i>0.610</i>     | 1.071                       | 0.57  | <i>0.060</i>     | 0.41                      | 0.802 | <i>0.609</i>     | 1.017                     | 1.915 | <i>0.595</i>     |
| Rainfall T2 # SPEEDY 3          | 7.293                | 2.728  | <b>0.008</b>     | 1.534                       | 0.525 | <b>0.003</b>     | 0.569                     | 0.749 | <i>0.447</i>     | 4.503                     | 1.791 | 0.012            |
| Rainfall T3 # SPEEDY 3          | 7.239                | 2.706  | <b>0.007</b>     | 1.347                       | 0.523 | 0.010            | 2.157                     | 0.742 | <b>0.004</b>     | 4.745                     | 1.779 | <b>0.008</b>     |
| Variance Partition Coefficients |                      |        |                  |                             |       |                  |                           |       |                  |                           |       |                  |
| School                          | 14.6%                |        | <b>0.004</b>     | 29.4%                       |       | <b>&lt;0.001</b> | 16.9%                     |       | <b>&lt;0.001</b> | 0.5%                      |       | <i>0.599</i>     |
| Participant                     | 23.0%                |        | <b>&lt;0.001</b> | 21.3%                       |       | <b>&lt;0.001</b> | 14.6%                     |       | <b>&lt;0.001</b> | 17.7%                     |       | <b>&lt;0.001</b> |
| Day                             | 62.4%                |        | <b>&lt;0.001</b> | 49.4%                       |       | <b>&lt;0.001</b> | 68.6%                     |       | <b>&lt;0.001</b> | 81.9%                     |       | <b>&lt;0.001</b> |

Reference categories for categorical variables: Sex = male, Study phase = SPEEDY 1 (2007), Rainfall tertile = Tertile 1 (0mm rain)

Variance Partition Coefficients describe the percentage of residual variance remaining at each level of the model hierarchy.

For p values, **bold font** indicates statistical significance  $p < 0.01$ , regular font indicates statistical significance  $p < 0.05$ , and *italic font* indicates statistical non-significance ( $p \geq 0.05$ )
